# Supplementary material for: Identification of potential transcriptomic markers in developing pediatric sepsis: a weighted gene co-expression network analysis and a case–control validation study
Source: PubMed Central journal article supplement (PMC5729245; doi:10.1186/s12967-017-1364-8), 2017-12-13

**Additional file 1:** Analysis of network topology for candidate soft-thresholding powers

( $\beta$ s).  $\beta$  was set to 14, the lowest power for which the scale-free topology fit index curve flattened out upon reaching close to 0.90.

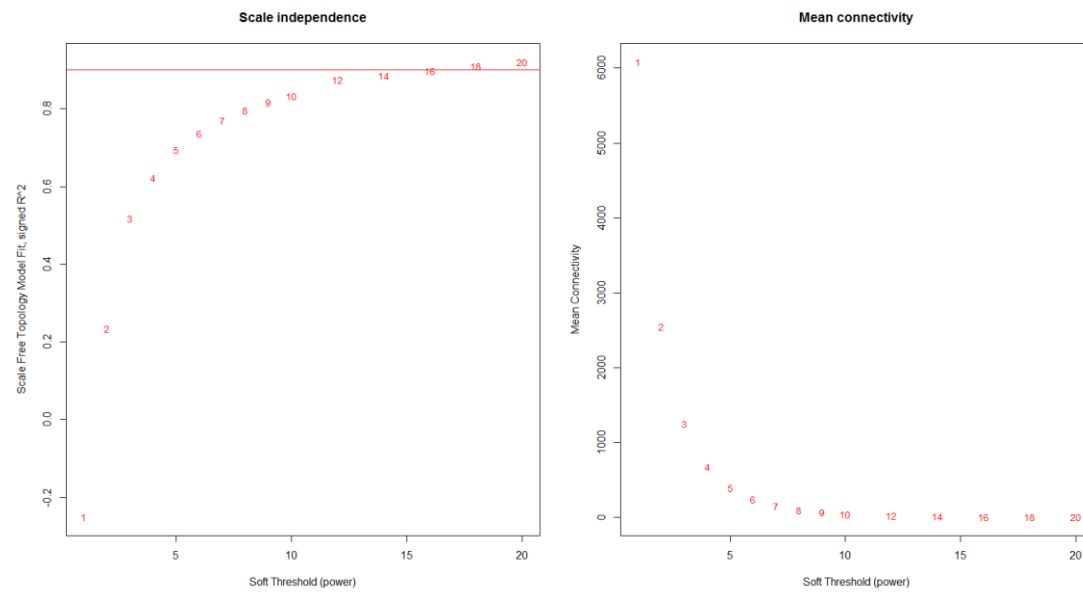

Supplement: 12967_2017_1364_MOESM1_ESM.pdf [file 12967_2017_1364_MOESM1_ESM.pdf]
