# Supplementary material for: Identification of potential transcriptomic markers in developing pediatric sepsis: a weighted gene co-expression network analysis and a case–control validation study
Source: PubMed Central journal article supplement (PMC5729245; doi:10.1186/s12967-017-1364-8), 2017-12-13
Supplement: 12967_2017_1364_MOESM2_ESM.pdf [file 12967_2017_1364_MOESM2_ESM.pdf]

**Additional file 2.** Primers designed for validation of hub gene expression patterns by qPCR.

| <b>Primer</b>  |           | <b>Sequence (5' – 3')</b> |
|----------------|-----------|---------------------------|
| MYBL1          | Sense     | AGGCAAGCAGTGTAGAGAAAGA    |
|                | Antisense | CGATTTCCCAACCGCTTATGT     |
| KLRG1          | Sense     | CCAGACCGCTGGATGAAATATG    |
|                | Antisense | CTGATTGTCCGTTATCACAAGGA   |
| STOM           | Sense     | CACACACGGGACTCCGAAG       |
|                | Antisense | ATGAGAACGCCACCAAATCC      |
| MS4A4A         | Sense     | TGAGCCTTAGCATGGGAATAACA   |
|                | Antisense | CCCGATATACACGGAAATAGGGT   |
| $\beta$ -actin | Sense     | AGAGCTACGAGCTGCCTGAC      |
|                | Antisense | AGCACTGTGTTGGCGTACAG      |
